# Supplementary material
Source: PubMed Central journal article supplement (PMC5563985)
Supplement: cdd201774x2.pdf [file cdd201774x2.pdf]

# FigS1.

## S1A

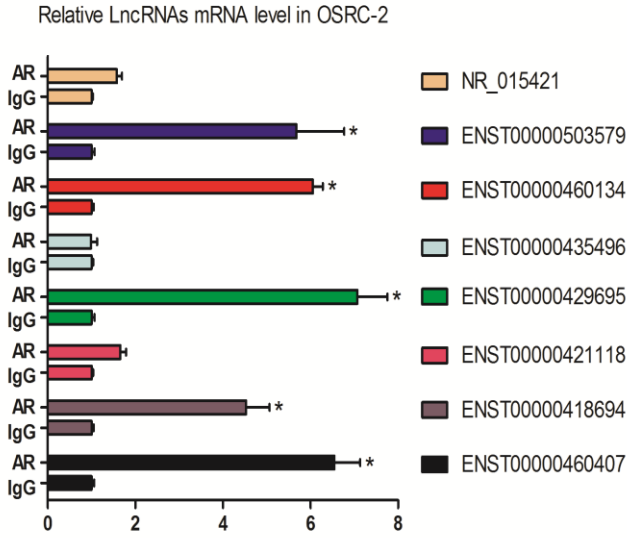

## S1B

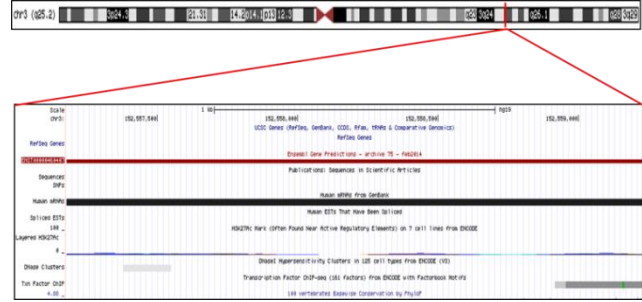

## S1C

```

1  tgatgattga agtatgttta ttgtaaagggc agaaatggtg tggcatttgg ataaaaaact
61  gctaacatta tagaacttat tacctaacaa aatttcacac cacaaaaaat attttaatgg
121 caaattcaag gtgttttatt gcttcaaaa cagcatcttt gactctttga acatcaattt
181 gtgtttacat tgaaatgaca aaaaagacaaa atcaagaaga atacagcgtg caacttggaa
241 ttcagagtta aaaccatgat gtggcgcctc agccaactat gtgactgttg accctttcaa
301 gaacacacat ggatttaaaa gttggatgac atccattgtt ggggccttgg gggatattgt
361 aaagcatgaa aactaaacag ccaggagcct gtgaaatctg ctactgtatt ttccaggact
421 tcattccact ccttgcttaa aaaaactctg gaagtttcac agattatgat gtggacctgt
481 cacctgtaaa ttgtctcaat ctactcagac aagacactaa actgcttttg gatactatag
541 atgctcagtc ttatagcagc tgaattttgg ctatgacaaa gttttaaga tgaataacta
601 gttagtatct attgaagcctt aaactttgct ggtcaggttg tagctattgt aaagatattt
661 attgaagaag ctacagctcc ttcagttgta cagactgaaa aactttcatg aaagatccaa
721 cataactaat taattatata ttattacaat gtatgatatt aatgtgtcaa actggtgat
781 tttacaaaat atataatgca tacataataa agagttgtat attacagtc ttttcaataa
841 tcagtgcttt ggaatattta agtcttcaca ttttttggct taaaatatga aaagttttca
901 tgatacaagt gattaatttt coctagtagt gcttttgcac gtttgccttt ttatttaagt
961 tttttctat atagacacaa ttgtgtgca gactatcata agatcgatag tgaatataaa
1021 atatcttagc caaatggggt ctgtattgtc tacatttat atattaataa aaagtttttg
1081 ttgtcttttc aggaggttta gagtattgtc actaaatgat atcaaagctt ccttttccaa
1141 atgcaaaagt ctgtctctac attttaagtt gatctgtcat gtttttagcag tcaagtggga
1201 tggcatttat ataaacaag ttacaatgta aggaaactct ttaaggagat ggggagagaa
1261 aaaggcagct ggtataatcg gttactgctg cttagtctca ctttaatttt tegtgtgctt
1321 cttcttaagg tgagatagca taacttaaac tgttttgaga tggaaattta aagttaacaca
1381 ctaccagcga gttcaaacct gctattgatt ttaatctgtt ttttttggtt tagttgataa
1441 cttaaattcc aagtttcata gtgataattg tatattattt gectgctgaa ttctgtttaga
1501 gttttttatt ctgttgtaca ttgtattata cacataatca caaatttaata tgaaggtgaa
1561 tatattgtac atatcaaaat ttgtgaattt gaattatagt atgttttagt gctattgcaa
1621 aaaaatttta tttttatatt atctgtgatt ttaataataga tgattgaact agatttcttt
1681 ttgagtgata gtgccattga atgagcagta tggaaacagc gttacttgat attttgagct
1741 ttctcaggtt tatcctaact agtggtagct taacaaaccc cagactaatt gtgtgttaatt
1801 gtatttttaa taaaaggaaa gtacatttcc taataatgca tagtactgtt tgcattgtaag
1861 agtatgcaaa accttgtgtg tgtgtgtgtg tgtgtgtgtg tgtgtgtgtc ttagtgtgtg
1921 taaggcatgg cagccaactt tgatctgctc atttttagta cgagcagagc ttcataattg
1981 ttgtcactag aactgtactt accatggaca gttaaaactg aaaaagactc aataaaaacta
2041 tgaaacatgg
  
```

## S1D

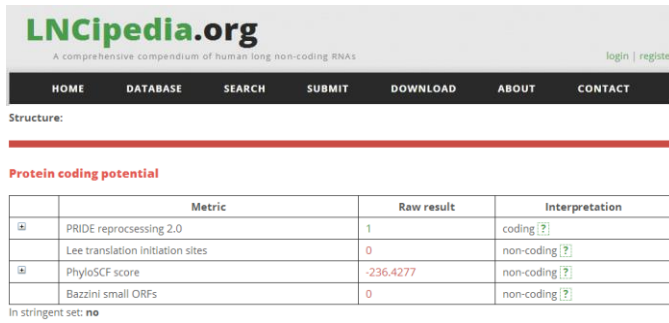

## S1E

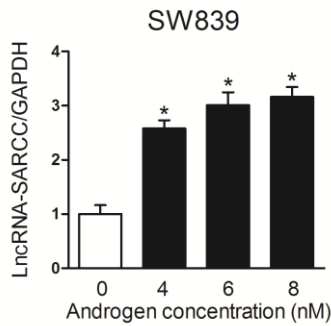

## S1F

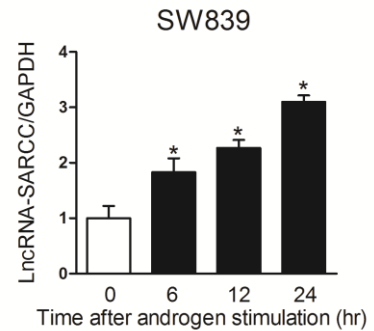

## S1G

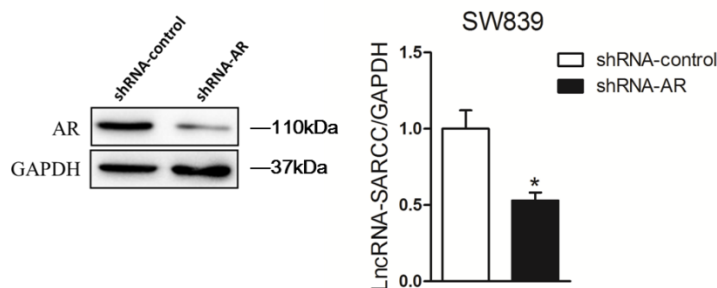

# FigS1.

S1H

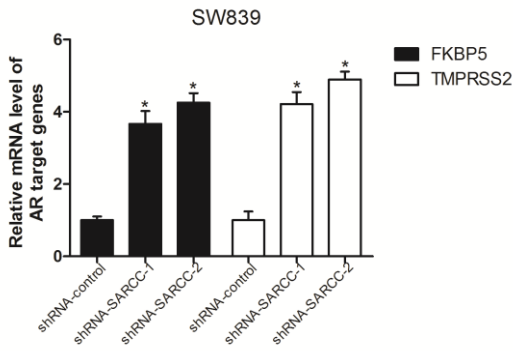

S1I

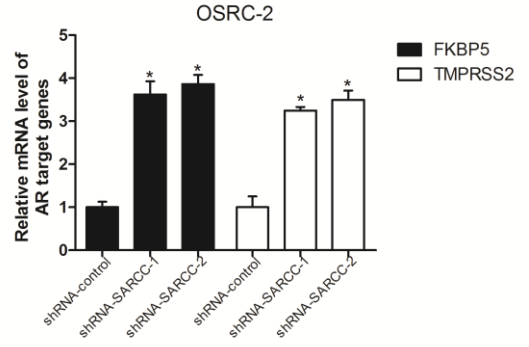

S1J

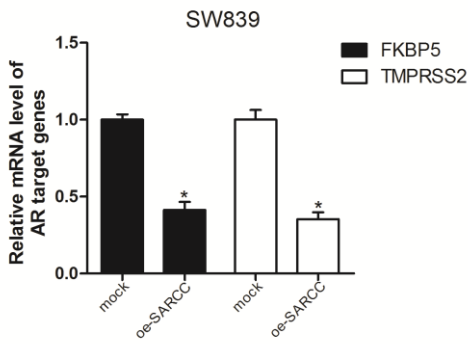

S1K

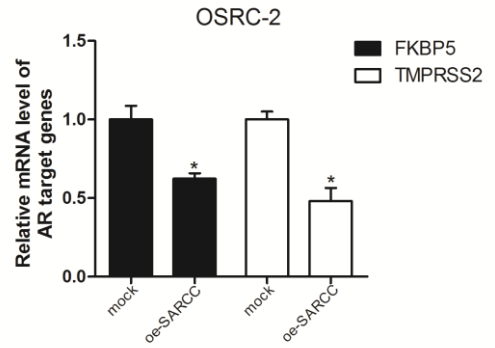

S1L

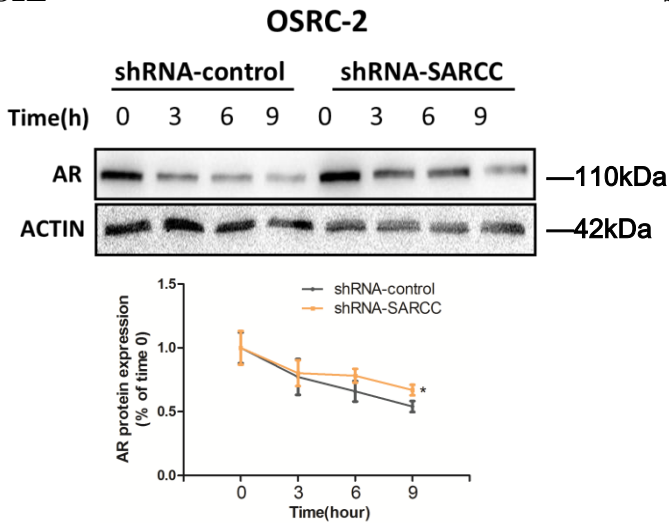

S1M

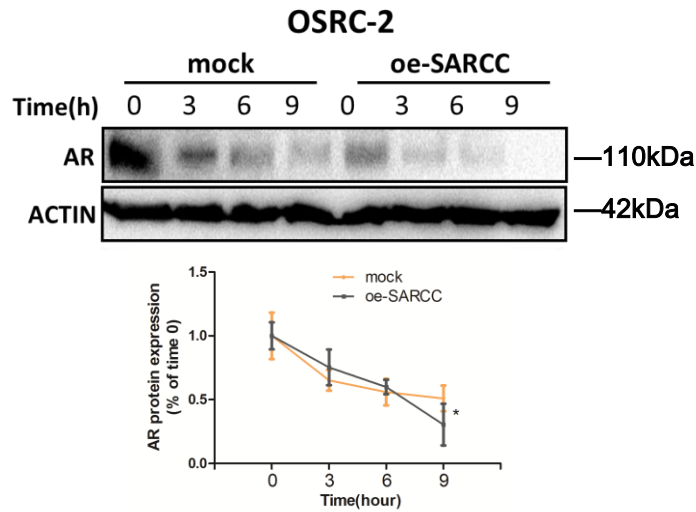

S1N

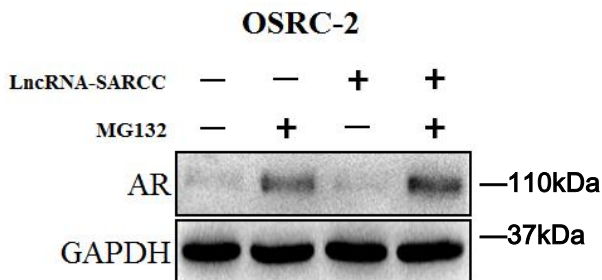

# FigS2.

## S2A

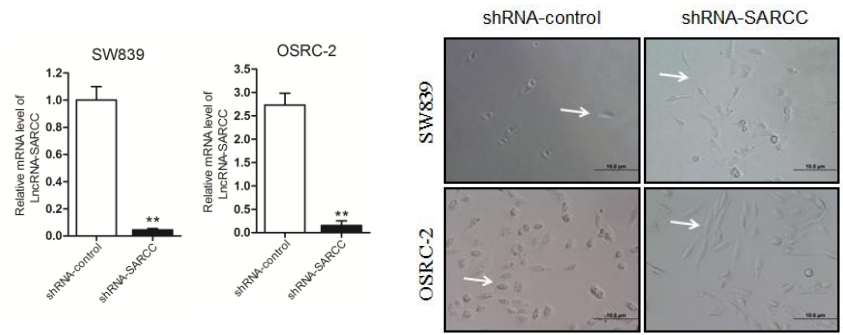

## S2B

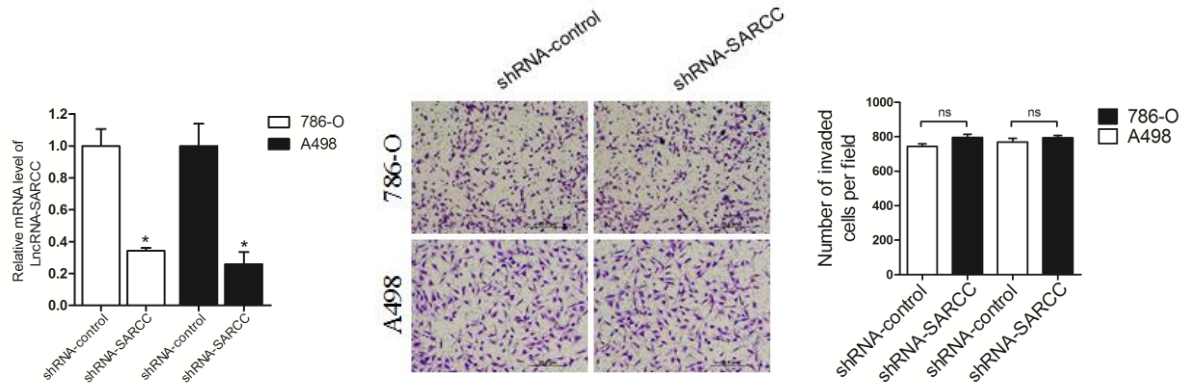

## S2C

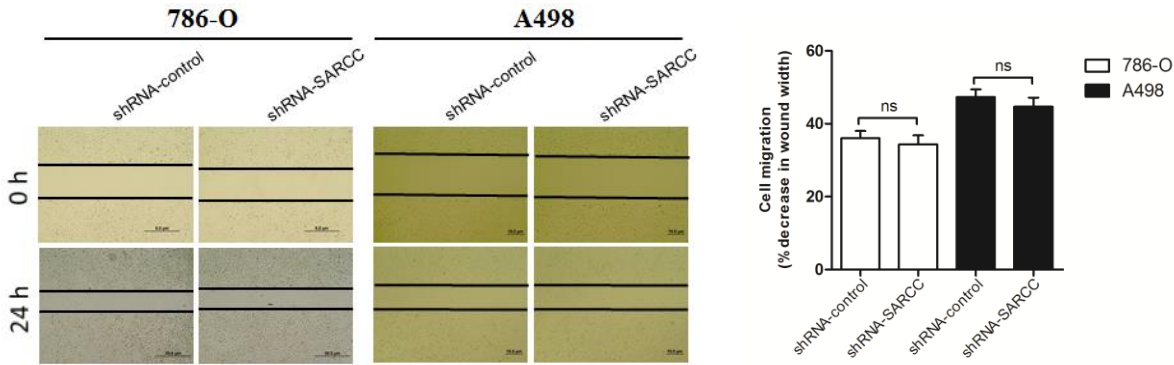

## S2D

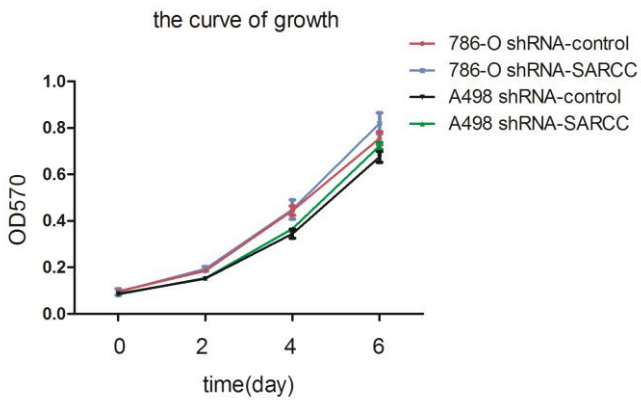

# FigS3.

## S3A

## S3B

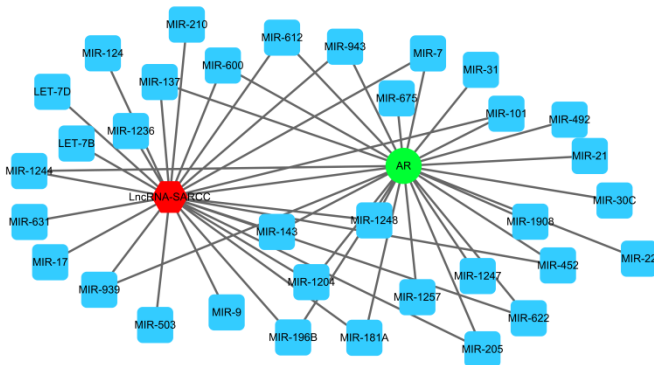

## S3C

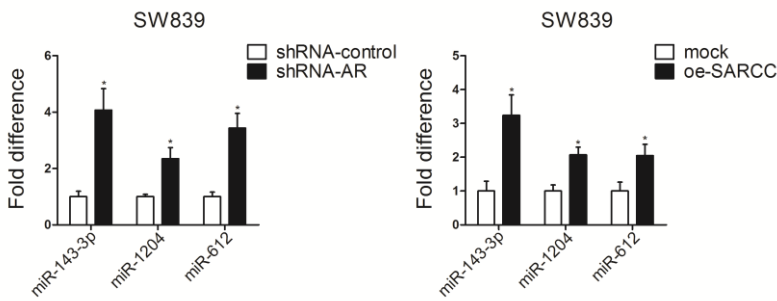

## S3D

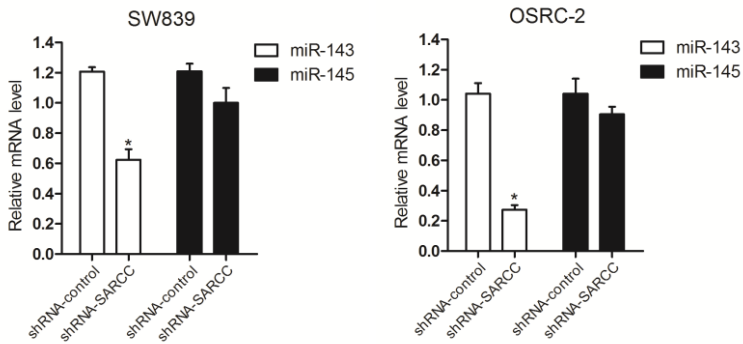

## S3E

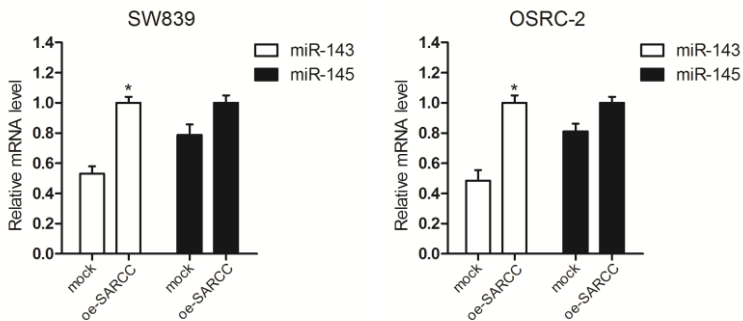

| miRNANA candidates | relationship |
|--------------------|--------------|
| miRNA-101          | both         |
| miRNA-1204         | both         |
| miRNA-1244         | both         |
| miRNA-1248         | both         |
| miRNA-137          | both         |
| miRNA-143          | both         |
| miRNA-181a         | both         |
| miRNA-196b         | both         |
| miRNA-205          | both         |
| miRNA-452          | both         |
| miRNA-600          | both         |
| miRNA-612          | both         |
| miRNA-622          | both         |
| miRNA-7            | both         |
| miRNA-939          | both         |
| miRNA-943          | both         |
| let-7b             | LncRNA-SARCC |
| Let-7d             | LncRNA-SARCC |
| miRNA-1236         | LncRNA-SARCC |
| miRNA-124          | LncRNA-SARCC |
| miRNA-17           | LncRNA-SARCC |
| miRNA-210          | LncRNA-SARCC |
| miRNA-503          | LncRNA-SARCC |
| miRNA-631          | LncRNA-SARCC |
| miRNA-9            | LncRNA-SARCC |
| miRNA-1247         | AR           |
| miRNA-1257         | AR           |
| miRNA-1908         | AR           |
| miRNA-21           | AR           |
| miRNA-22           | AR           |
| miRNA-30c          | AR           |
| miRNA-31           | AR           |
| miRNA-492          | AR           |
| miRNA-675          | AR           |

# FigS3.

S3F

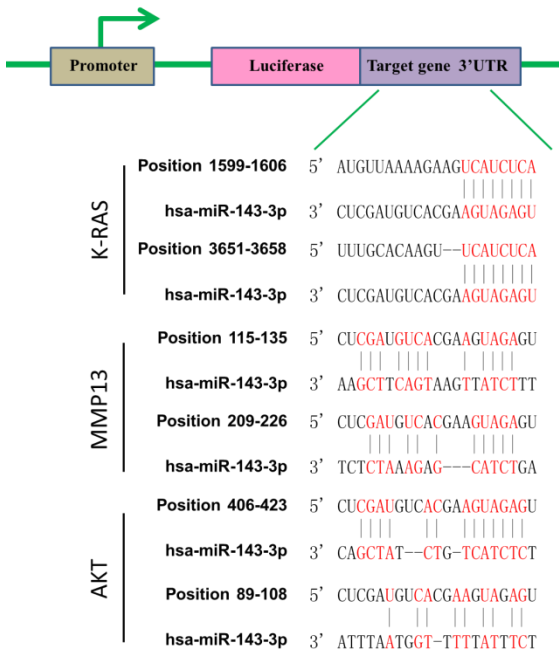

S3G

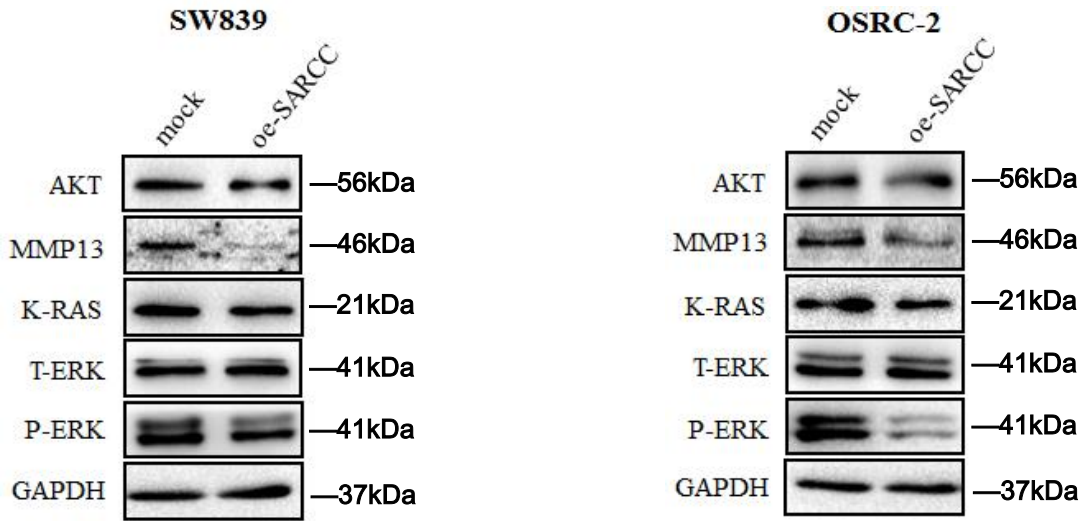

S3H

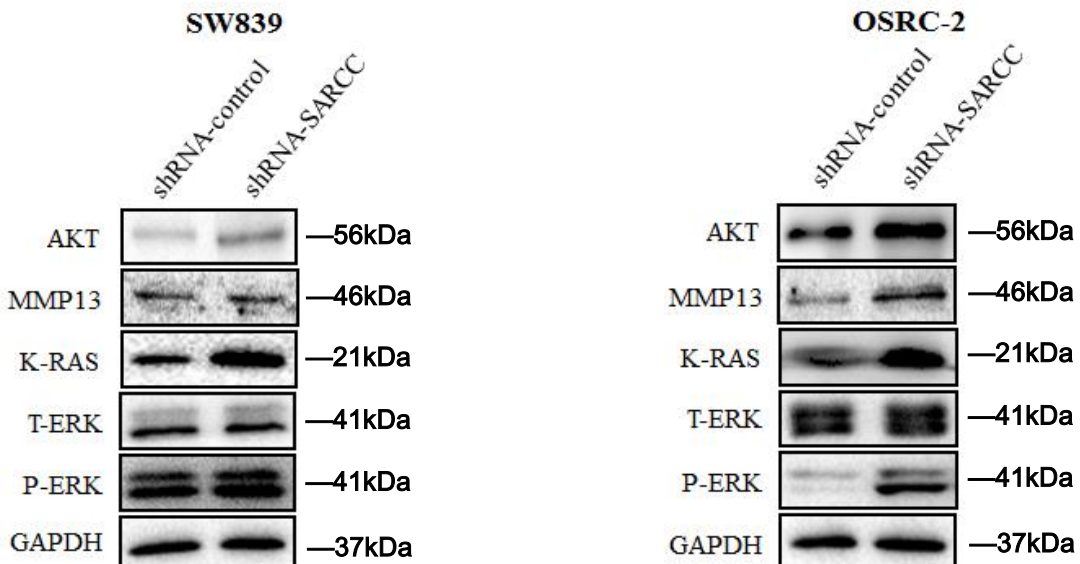

**S4A**

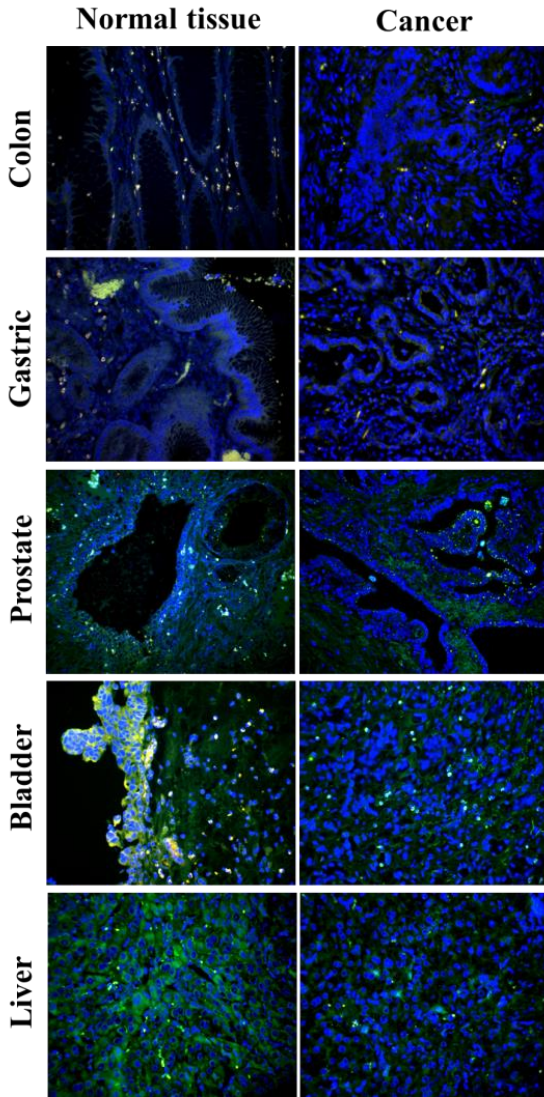

**S4B**

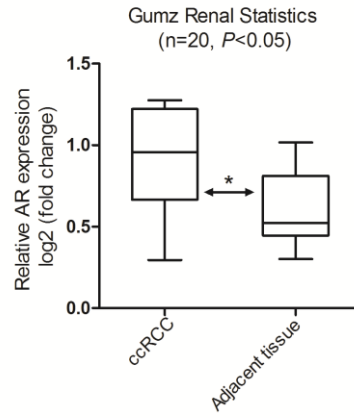

**S4C**

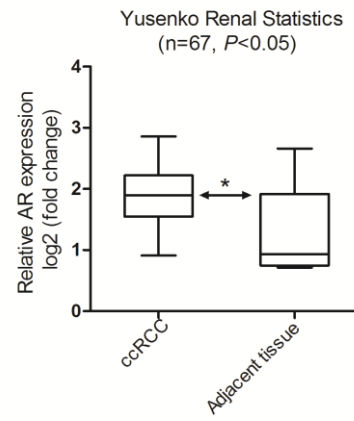

**S4D**

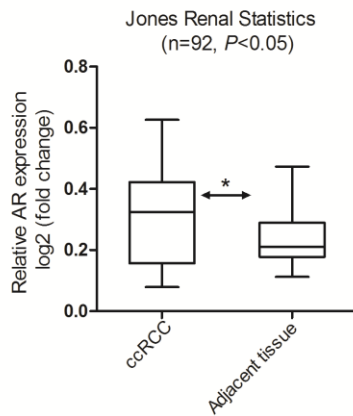

**S4E**

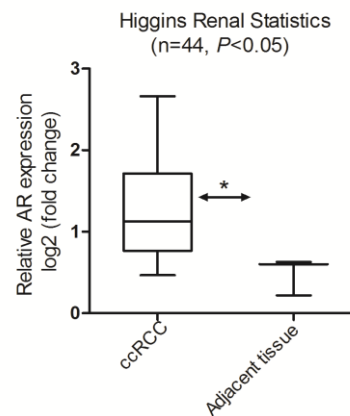

# FigS5.

S5A

```
5' CATCTTTCATGTGAACCTCTATGGCAGCATCTTGTTTCTGACATGCATCAGTGCCCA  
CCGGTACAGCGGTGTGGTGTACCCCTCAAGTCCCTGGGCCGGCTCAAAAAGAAGAATG  
CGATCTGTATCAGCGGTGCTGGTGTGGCTCATTGTGGTGGTGGCGATCTCCCCATCCTC  
TTCTACTCAGGTACCGGGGTCCGCAAAAACAAAACCATCACCTGTTACGACACCACCTC  
AGACGAGTACCTGCGAAGTTATTTATCTACAGCATGTGCACGACCGTGGCCATGTTCT  
GTGTCCCTTG3' +
```

S5B

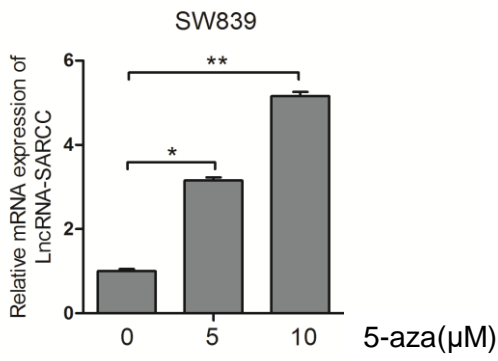

S5C

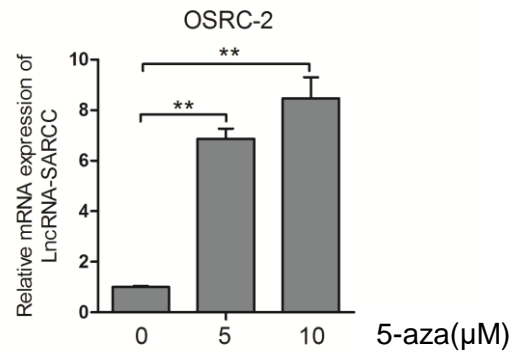

S5D

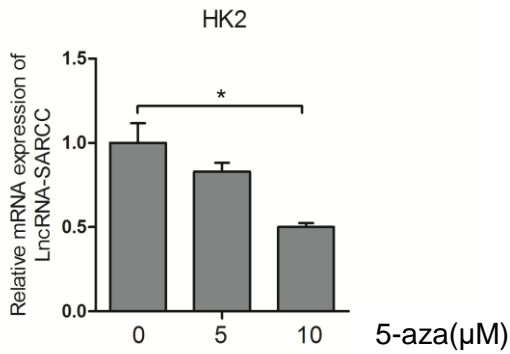

# FigS6.

## S6A

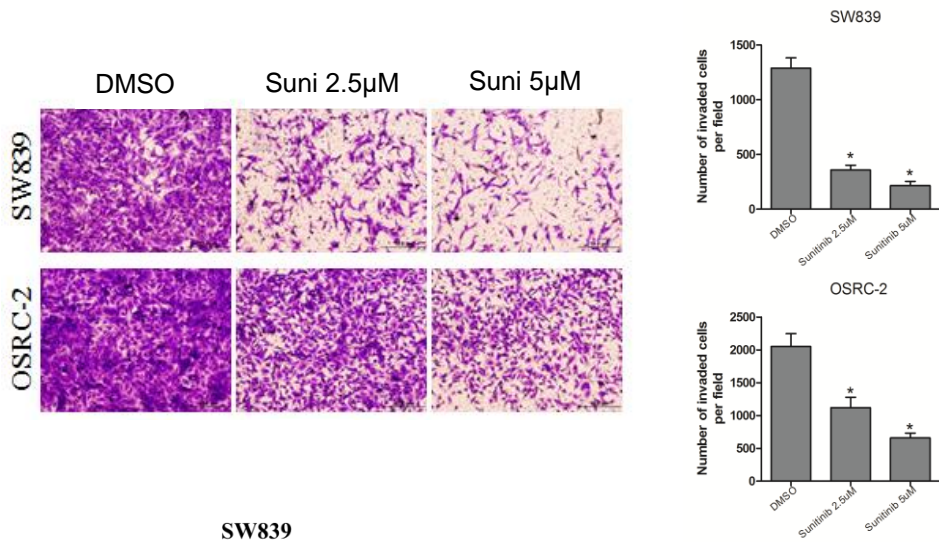

## S6B

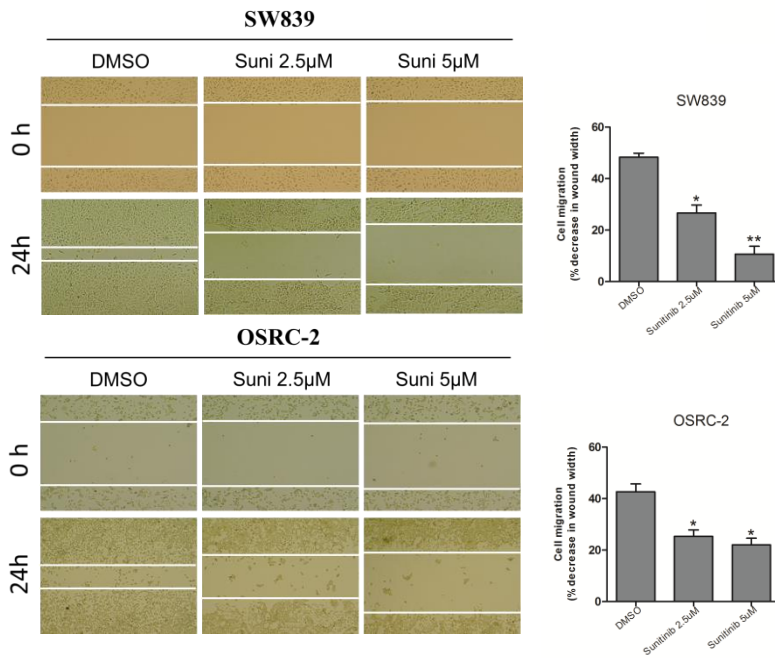

## S6C

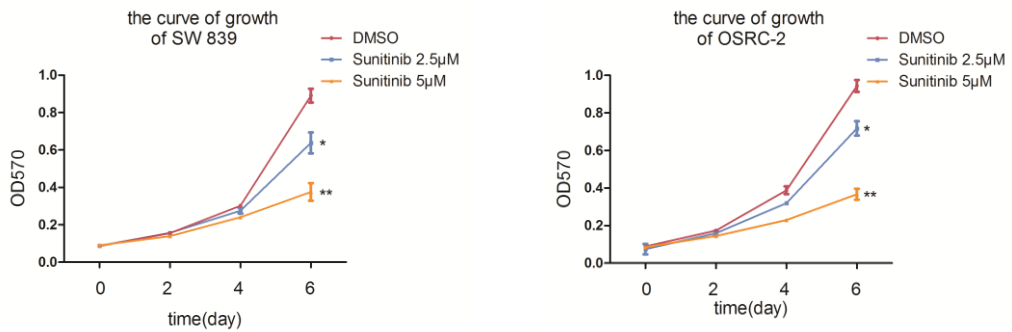

## S6D

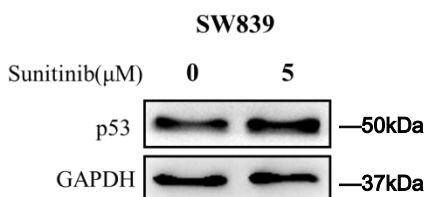

## S6E

```

GTGAGATAATGCAATTGACAAATCCCAAACAATCCAGTGTCAAAGGAATTT
TTAGTTTTGGGAAGCTATCCCTCATAAAGTCAACATCAGAGTTTGCAACTGA
TGGTGGCATAAATGTTTGAAGCACTTTACAAGTAGACAAACATGGGGT
GTATGTTAAGGCAAGAAAGAACCTTAGTGCCCGTGGACCAATAATGACAGG
AAATTTTCAGGCTTGATTTCAGTTCTTGCAATGCCTATGTAGATTGAGGA
TTTGTGAGACCTTCAGAGTAGCTTCACTTTACCCAATCTCTGGCCAATAAG
ATCAATGAAGAAAAGCTGTATTTAACCTTCCAAAGCAGTGATTCTTTTTAC
ATGTTTCAGTTTTAATGCATAGGATTATAGAAACCAATCAAGAAGAAACCT
ACTACACCTCCTTATTTTGGAGAAAGAGAGGGTTAGCAAGTTCTCACTTC
ATCAGGCTCAAATAACATCCGTTTATAGATTCTTCAAGACAAAATCTAAAA
TATGTCATTACTTTTATGACCTTGTAAACAAGATCAATATCATTAAACTG
ACCAAGATGGAAATACAGGACTTGTACCAGACTTGAACCTGTAGCCCTAAT
GATACACATTTTTACAATATTTCTCACCATTAGTTTTCTTTCTTTAGG
TCTCAGGATGCTCAGCTTAATTTAGAGTATGTGTTAAGTACATGTTTCAG
CGTCCAGAGAATTTGTGAGTGTGATCCAGTGAGGAGTGAACAGTAACCT
AGAAATGCTTGTACTACTTGGCATGTTTTTCCAAAAGTGTCTCTTTT
AGTTCATACATCAGATATGGACACTGATGACATGTGAATGATGCCACAT
AGTAACAAGAAATGATCTTGCACCTCTTCCAAGCCAAAAGAACCTTGG
GAAGGTGTGCCAATGGTGAACCGTACAGAGGGTCAGGGTGAAGCAGTGT
CTCTATTGGCTGAAAAACTGATCAGGTCATAT
    
```
